# Supplementary material for: An acid-free process for selective REE recovery from spent NdFeB magnets by room-temperature electrolysis
Source: Royal Society of Chemistry journal article supplement (doi:10.1039/d3gc03031h), 2023-01-01
Supplement: d3gc03031h1.pdf [file d3gc03031h1.pdf]

## Supplement Material

### **An acid-free process for selective REEs recovery from spent NdFeB magnets by room-temperature electrolysis**

Zhang Zhihan<sup>a, b</sup>, Wang Zhi<sup>c</sup>, Wang Dong<sup>b, c\*</sup>, Min Rui<sup>a, b</sup>, Xiao Wanhai<sup>b, c</sup>, Lin Yong<sup>b, c</sup>, Li Guobiao<sup>b, c\*</sup>

- a. School of Rare Earths, University of Science and Technology of China, Hefei 230026, China
- b. Jiangxi Province Key Laboratory of Cleaner Production of Rare Earths, Key Laboratory of Rare Earth, Ganjiang Innovation Academy, Chinese Academy of Sciences, Ganzhou 341000, China
- c. Key Laboratory of Green Process and Engineering, National Engineering Research Center of green recycling for strategic metal resources, Institute of Process Engineering, Chinese Academy of Sciences, Beijing 100190, China

\*Corresponding Author: Wang Dong, E-mail: [wangdong@ipe.ac.cn](mailto:wangdong@ipe.ac.cn); Li Guobiao, E-mail: [gbli@gia.cas.cn](mailto:gbli@gia.cas.cn);

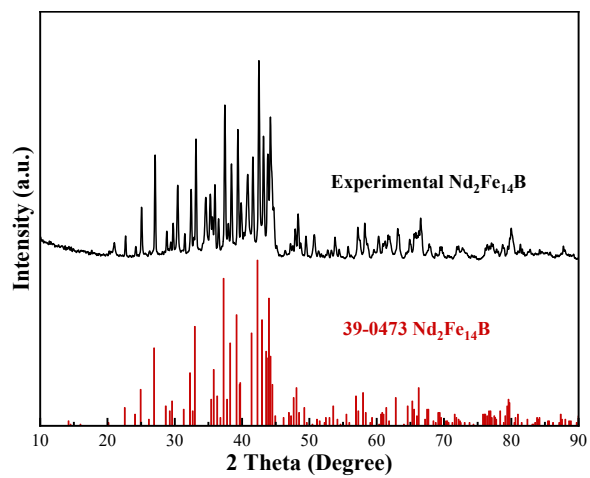

Fig. S1 Analysis of XRD spectra of EOL NdFeB magnets used in experiments.

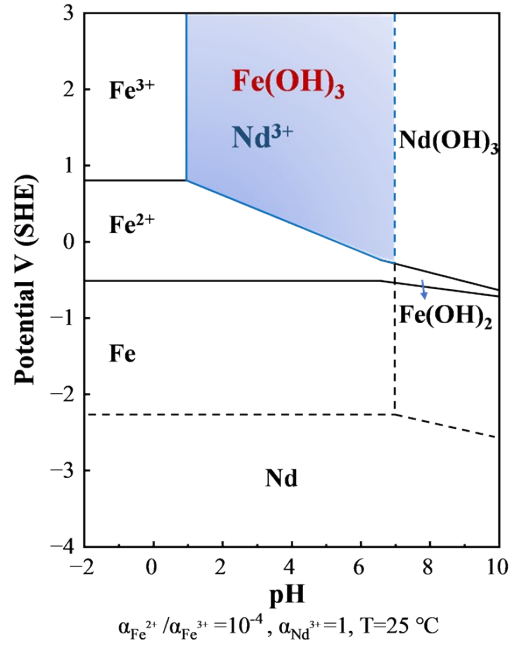

Fig. S2 E -pH of Nd - H<sub>2</sub>O and Fe - H<sub>2</sub>O systems. (Based on reference data and using HSC to plot <sup>1</sup>.)

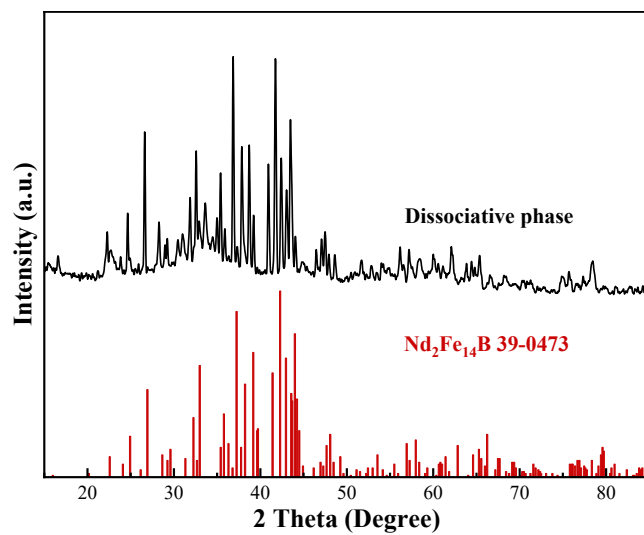

Fig. S3 Electrolytic dissociative phase XRD analysis.

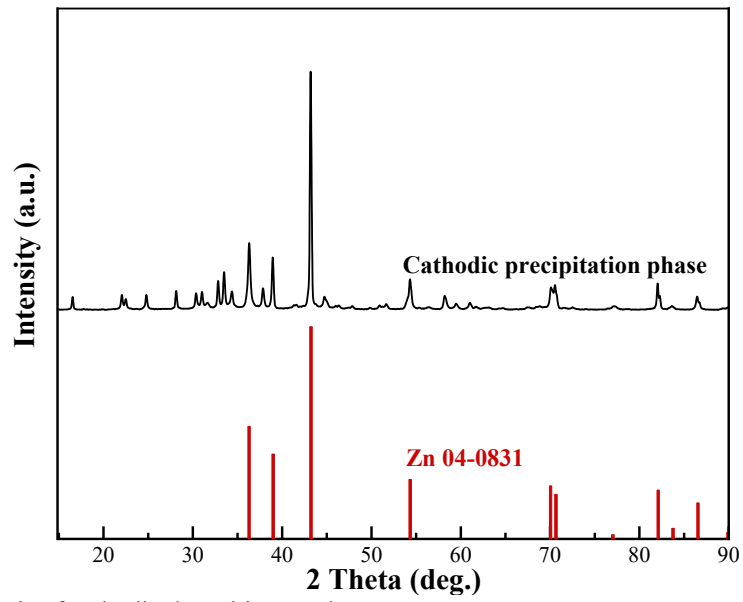

Fig. S4 XRD analysis of cathodic deposition products.

Table S1. PH of ZnCl<sub>2</sub> solution at different temperatures.

| Temperature (°C) | 25   | 40   | 50   | 60   |
|------------------|------|------|------|------|
| pH               | 4.69 | 4.21 | 3.89 | 3.63 |

Table S2. The effect of adding different amounts of Na<sub>2</sub>SO<sub>4</sub> on the pH value of electrolytes.

| Na <sub>2</sub> SO <sub>4</sub> :Nd <sup>3+</sup> (mol) | 0    | 2:1  | 4:1  | 6:1  | 8:1  |
|---------------------------------------------------------|------|------|------|------|------|
| pH of electrolytes                                      | 4.72 | 4.77 | 4.75 | 4.76 | 4.75 |

Table S3. Analysis of ICP-OES testing for obtained every 1g REOs.

| Element | Nd    | Pr    | Dy    | Fe  |
|---------|-------|-------|-------|-----|
| Wt (%)  | 77.16 | 11.17 | 11.67 | 0.1 |



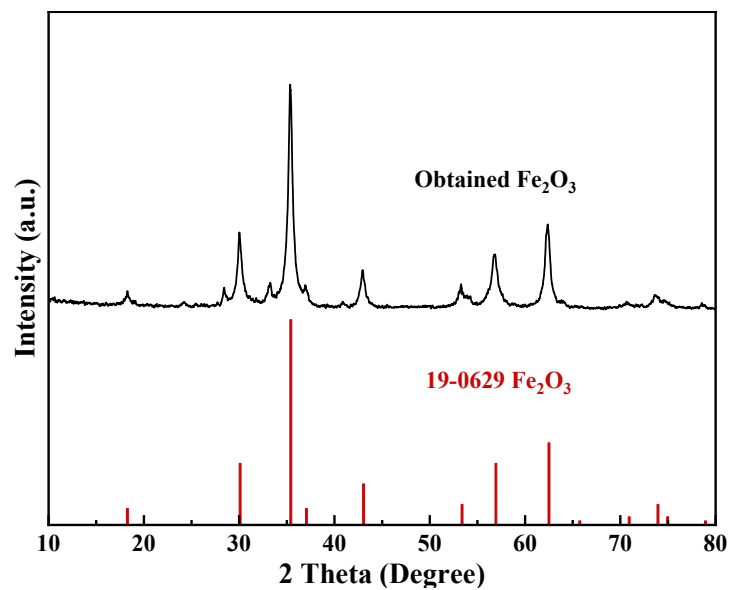

Fig. S5 XRD analysis of obtained  $\text{Fe}_2\text{O}_3$  products.

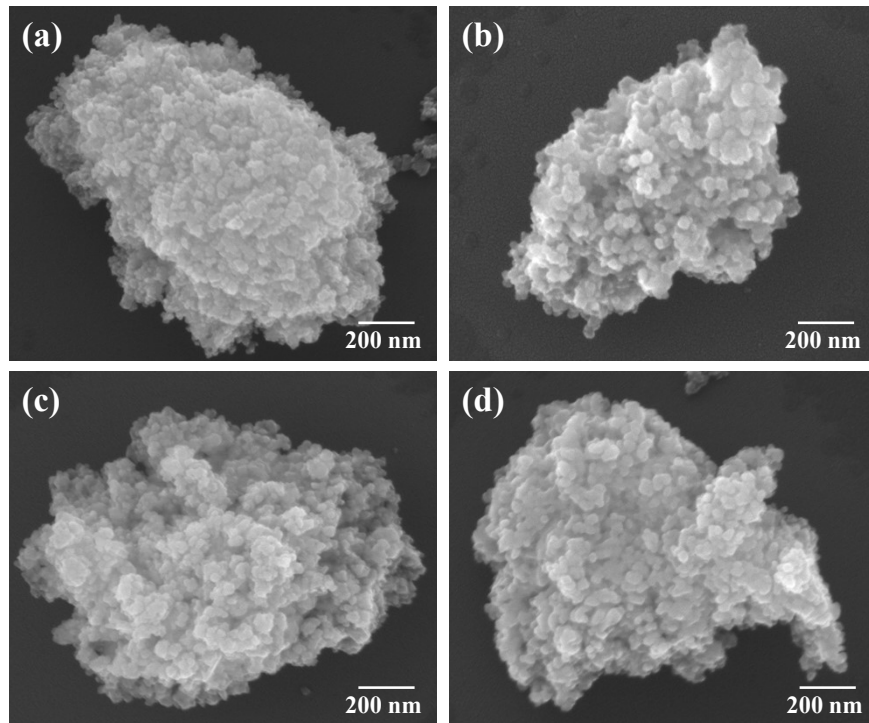

Fig. S6 SEM analysis of obtained Fe<sub>2</sub>O<sub>3</sub> products.

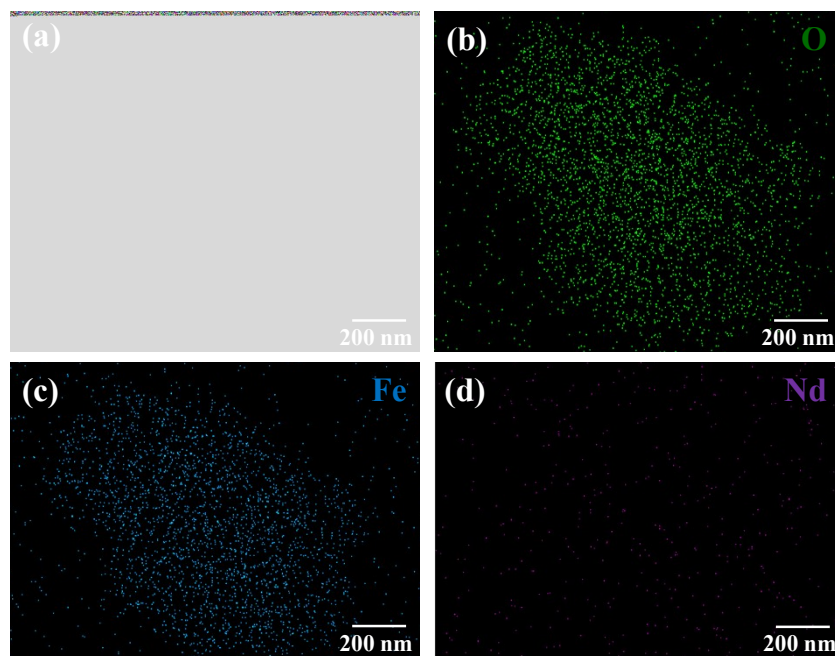

Fig. S7 SEM-Mapping analysis of obtained  $\text{Fe}_2\text{O}_3$  products.

Table S4. Elements quantitative analysis of Fe<sub>2</sub>O<sub>3</sub> SEM-Mapping.

| Element | Wt %   |
|---------|--------|
| O       | 28.45  |
| Fe      | 71.55  |
| Nd      | 0.00   |
| Total   | 100.00 |

Table S5. ICP-OES analysis of Fe<sub>2</sub>O<sub>3</sub>.

| Element                | Wt %  |
|------------------------|-------|
| Fe (theoretical value) | 69.90 |
| Fe (actual value)      | 69.55 |
| Nd                     | 0.46  |
| Pr                     | 0.03  |

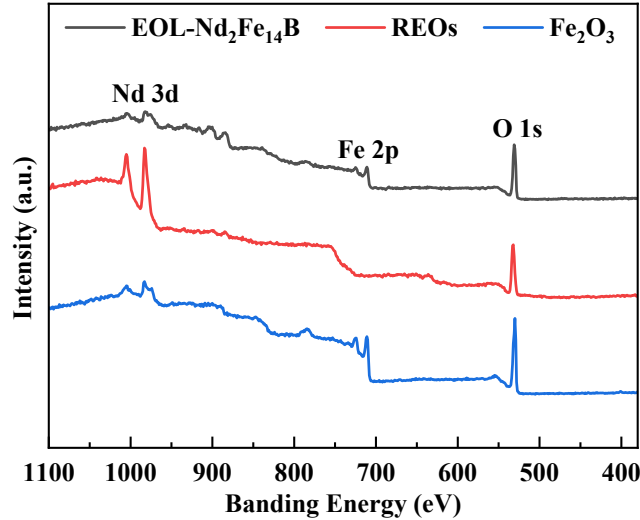

Fig. S8 The XPS survey spectra of the EOL-Nd<sub>2</sub>Fe<sub>14</sub>B, REOs, and Fe<sub>2</sub>O<sub>3</sub>.

EOL-NdFeB, REOs, and obtained Fe<sub>2</sub>O<sub>3</sub> was characterized by XPS to analyze its elemental composition (Fig. S8). In the obtained REOs mainly composed of Nd<sub>2</sub>O<sub>3</sub>, almost no XPS peak of Fe 2P appeared, indicating that they almost didn't contain Fe element,, which is consistent with the results of ICP (Table S3). There are still peaks of Nd element present in the XPS full spectrum analysis of Fe<sub>2</sub>O<sub>3</sub>, which is consistent with its icp test results (Table S5). Subsequently, high-resolution XPS analysis was performed on Fe 2P and Nd 3d of Fe<sub>2</sub>O<sub>3</sub> (Fig. S9). The binding energies of Fe in Fe 2P are 709.68 eV, 711.17 eV, 718.18 eV, 723.19 eV, and 724.88 eV, respectively, which are similar to the previously reported binding energies of Fe<sub>2</sub>O<sub>3</sub><sup>2,3</sup>. The binding energies of Nd in Nd 3d are 1008.77 eV, 1006.39 eV, 1002.95 eV, 995.17 eV, 983.71 eV, 980.35 eV, and 975.43 eV, respectively, which are similar to previous study<sup>4,5</sup>.

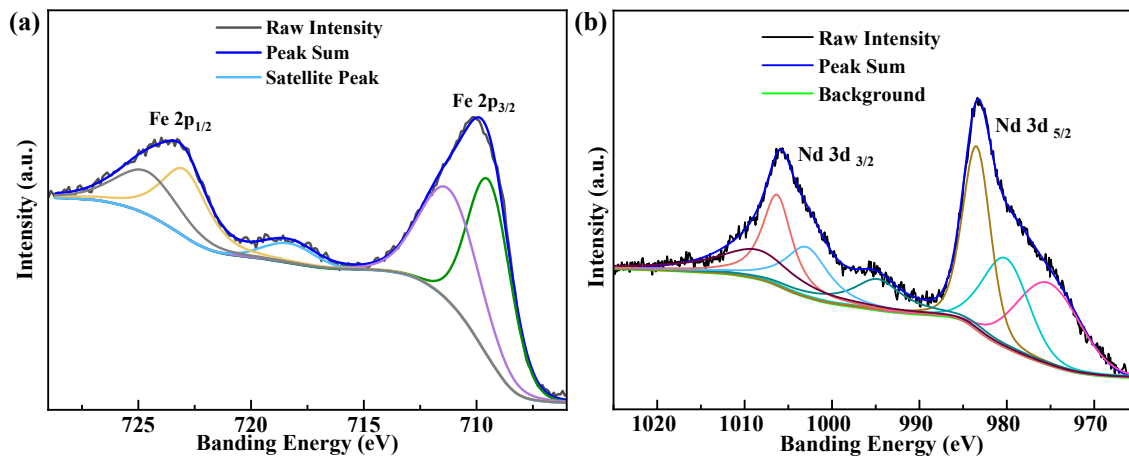

Fig. S9 The XPS spectra for (a) Fe 2p and (b) Nd 3d of obtained Fe<sub>2</sub>O<sub>3</sub>.

Table S6. Comparison of present work and other similar work

| Scheme                                                                                 | Major Chemical Inputs                                                                                                    | Energy Consumption                          | References                      |
|----------------------------------------------------------------------------------------|--------------------------------------------------------------------------------------------------------------------------|---------------------------------------------|---------------------------------|
| Leaching with HCl and solvent extraction using NaCyanex 302                            | 1 mol Nd <sub>2</sub> O <sub>3</sub> ;<br>15.6 mol HCl<br>9.4 mol NaCyanex 302                                           | 1.98 kwh/kg Nd <sub>2</sub> O <sub>3</sub>  | Padhan et al. <sup>6</sup>      |
| Anion exchange membrane combined with dual electrolysis chamber                        | 1 mol Nd <sub>2</sub> O <sub>3</sub> ;<br>384 mol NaCl                                                                   | 15.00 kwh/kg REOs                           | Prakash et al. <sup>7</sup>     |
| Electrochemical dissolution of NdFeB followed by deposition of Fe and Nd, respectively | 1 mol Nd <sub>2</sub> O <sub>3</sub> ;<br>2.4 mol H <sub>2</sub> SO <sub>4</sub><br>2mol Na <sub>2</sub> SO <sub>4</sub> | 4.85 kwh/kg REOs                            | Xu et al. <sup>8</sup>          |
| Extraction of REEs and Fe from NdFeB by co-leaching stepwise precipitation method      | 1 mol Nd <sub>2</sub> O <sub>3</sub> ;<br>13 mol HCl<br>8 mol H <sub>2</sub> C <sub>2</sub> O <sub>4</sub>               | –                                           | Liu et al. <sup>9</sup>         |
| After roasting at 350 °C, leaching Nd with inorganic acid precipitation                | 1 mol Nd <sub>2</sub> O <sub>3</sub> ;<br>144.42 mol H <sub>2</sub> SO <sub>4</sub>                                      | 0.028 kwh/kg Nd <sub>2</sub> O <sub>3</sub> | Lee et al. <sup>10</sup>        |
| Demagnetized and roasted Leached with Citric/Maleic acid                               | 1 mol Nd <sub>2</sub> O <sub>3</sub> ;<br>22.86 mol Citric/Maleic acid                                                   | 8.14 kwh/kg Nd <sub>2</sub> O <sub>3</sub>  | Reisdorfer et al. <sup>11</sup> |
| ZnCl <sub>2</sub> solution as electrolyte combined with dual anode system              | 1 mol Nd <sub>2</sub> O <sub>3</sub> ;<br>4 mol Na <sub>2</sub> SO <sub>4</sub><br>8 mol NaOH                            | 2.67 kwh/kg REOs                            | Present work                    |

**Electricity consumption:** The calculation method for energy consumption is as follows: According to



the equation 5:  $P = (0.3 \text{ V} * 0.15 \text{ A}) + (3.3 \text{ V} * 0.06 \text{ A}) = 0.243 \text{ w}$ .  $W = P * t = 0.000243 \text{ kwh}$ . The electrolysis process adopted constant current electrolysis, and the voltage was calculated by taking the average value. Under this condition, 0.28 g NdFeB magnets can be electrolyzed. Then for every 1 kg of NdFeB magnets electrolyzed, 0.8678 kwh of electricity is required. Previously mentioned that 1.8678 kwh of electricity is required for processing 1 kg of NdFeB. The remaining 1 kwh of electricity is the energy consumption for roasting  $\text{Nd}(\text{OH})_3$  in a muffle furnace. By fully utilizing the volume of the muffle furnace, this part of energy consumption can be further saved. The size of the muffle furnace used is 15 \* 15 \* 15 cm, which can process 5 kg of  $\text{Nd}(\text{OH})_3$  in a single operation, and the energy consumption is 1 kwh. Calculated based on the production of 0.2 kg  $\text{Nd}(\text{OH})_3$ /kg of NdFeB magnets. So processing 1 kg NdFeB required an additional 0.04 kwh of electrical energy.

To sum up, taking into account the energy consumption of both parts, the required electrical energy for each 1 kg of NdFeB magnets processed by electrolysis is 0.9078 kwh. According to the calculation of producing 0.34 kg of REO per kg of NdFeB, the power consumption of 1kg REOs is 2.67 kwh.

Table S7. Current density of each electrode.

| NAA Current (A) | NAA Current Density<br>(A/cm <sup>2</sup> ) | PIA Current (A) | PIA Current Density<br>(A/cm <sup>2</sup> ) |
|-----------------|---------------------------------------------|-----------------|---------------------------------------------|
| 0               | 0                                           | 0               | 0                                           |
| 0.05            | 0.025                                       | 0.01            | 0.005                                       |
| 0.10            | 0.050                                       | 0.02            | 0.010                                       |
| 0.15            | 0.075                                       | 0.03            | 0.015                                       |
| 0.20            | 0.100                                       | 0.04            | 0.020                                       |
| 0.25            | 0.125                                       | 0.05            | 0.025                                       |
| -               | -                                           | 0.06            | 0.030                                       |
| -               | -                                           | 0.07            | 0.035                                       |

## Reference

- [1] Mikiya T., Tatsuya O., Kazuya K., et al. Recycling of Rare Earths from Scrap. Handbook on the Physics and Chemistry of Rare Earths, 2013, 43, 159-211.
- [2] L. Niu, G. Zhang, G. Xian, et al., Tetracycline degradation by persulfate activated with magnetic  $\gamma$ - $\text{Fe}_2\text{O}_3/\text{CeO}_2$  catalyst: Performance, activation mechanism and degradation pathway, Separation and Purification Technology. 259 (2) (2020), 118156.
- [3] Pavel K., Dinara S., Rashid D., and et al. Characterization of  $\text{Fe}_2\text{O}_3$  thin film on highly oriented pyrolytic graphite by AFM, Ellipsometry and XPS. 2019, 493, 673-678.
- [4] G.J. Gao, M.Q. Zeng, E.L. Zhang, et al., Dealloying corrosion of anodic and nanometric Mg41Nd5 in solid solution-treated Mg-3Nd-1Li-0.2Zn alloy. Journal of Materials Science and Technology. 83 (9) (2021) 161-178
- [5] John P. Baltrus, Murphy J. Keller. Surface Science Spectra. Rare earth oxides  $\text{Eu}_2\text{O}_3$  and  $\text{Nd}_2\text{O}_3$  analyzed by XPS. 2019, 26, 014001.
- [6] Padhan E., Nayak A. K., Sarangi K. Recovery of neodymium and dysprosium from NdFeB magnet swarf. Hydrometallurgy. 2017, 174, 210-215.
- [7] Prakash V., Tom V. H., Koen B., et al. Selective Extraction of Rare-Earth Elements from NdFeB Magnets by a Room-Temperature Electrolysis Pretreatment Step. ACS Sustainable Chemistry Engineering. 2018, 6, 9375-9382.
- [8] Xu, X., Sturm S., Samardzija, Z., et al. A facile method for the simultaneous recovery of rare-earth elements and transition metals from Nd-Fe-B magnets. Green Chemistry. 2020, 22, 1105-1112.
- [9] Liu Z., Zhou H., Li W. Separation and coextraction of REEs and Fe from NdFeB sludge by co-leaching and stepwise precipitation[J]. Separation and Purification Technology, 2022, 282, 119795, 2-9.
- [10] Lee, C. H., Chen, Y. J., Liao, C. H., et al. Selective leaching process for neodymium recovery from scrap Nd-Fe-B Magnet. Metall. Mater. Trans. A 2013, 44, 5825-5833.
- [11] Reisdorfer, G., Bertuol D., Tanabe E. H. Recovery of neodymium from the magnets of hard disk drives using organic acids. Miner.Eng. 2019, 143, 105938.
